## CONCISE COMMUNICATION

# Recombinant *Paragonimus westermani* Yolk Ferritin Is a Useful Serodiagnostic Antigen

Tae Yun Kim,<sup>1</sup> Il-Joong Joo,<sup>1</sup> Shin-Yong Kang,<sup>1</sup>  
Seung-Yull Cho,<sup>2</sup> Yoon Kong,<sup>2</sup> Xiao-Xian Gan,<sup>3</sup>  
Kom Sukomtason,<sup>4</sup> Kabkaew Sukomtason,<sup>4</sup>  
and Sung-Jong Hong<sup>1</sup>

<sup>1</sup>Department of Parasitology, Chung-Ang University College of Medicine, Seoul, and <sup>2</sup>Department of Molecular Parasitology, Sungkyunkwan University School of Medicine, Suwon, South Korea; <sup>3</sup>Institute of Parasitic Diseases, Zhejiang Academy of Medical Sciences, Hangzhou, China; <sup>4</sup>Department of Parasitology, Chiang Mai University Faculty of Medicine, Chiang Mai, Thailand

A recombinant protein of *Paragonimus westermani* yolk ferritin was bacterially produced from a previously cloned complementary DNA and was used as an antigen for an enzyme-linked immunosorbent assay (ELISA) against paragonimiasis- and other helminth-infected sera to evaluate its serodiagnostic potential. The ELISA revealed that paragonimiasis *westermani* had 88.2% sensitivity and 100% specificity. The positive and negative predictive values of the ELISA were calculated to be 100% and 97.1%, respectively. Sera from cats experimentally infected with *P. westermani* began to produce immunoglobulin G antibodies against the yolk ferritin at 13 weeks after infection, which suggests that the corresponding antigen was derived from the vitellaria in accordance with maturation of *P. westermani*. These results indicate that the recombinant *P. westermani* yolk ferritin is a potent serodiagnostic reagent for paragonimiasis *westermani* from an early stage of the infection.

Paragonimiasis is a disease caused by lung flukes of genus *Paragonimus* helminths. Pulmonary paragonimiasis, caused by *P. westermani* infection, is endemic in the Far East, southeastern Asia, and South America and remains a serious public health problem [1]. The diagnosis of human paragonimiasis *westermani* is dependent on detection of characteristic eggs in a sputum and/or stool examination. Although there have been some reports about serodiagnosis of the disease by using crude worm extracts as antigens, cross-reactions with other trematode infections, such as schistosomiasis, fascioliasis, or clonorchiasis, decreased the reliability of this diagnostic method [2, 3]. Purified antigens, such as cysteine proteinases of *P. westermani*, increased sensitivity to paragonimiasis sera and reduced cross-reactivity to fascioliasis sera [4]. Because purification of an antigenic protein from crude preparations to achieve homogeneity is a labor-intensive and time-consuming process, production of specific antigenic molecules into recombinant forms by using appropriate expression systems may be a good alternative way of alleviating the hindrances.

We cloned a *P. westermani* yolk ferritin cDNA (GenBank accession no. AF188720), produced its recombinant protein in a bacterial system, and characterized its biochemical and molecular biological properties (data not shown). Ferritin is an iron-storage protein identified in a wide range of organisms, from bacteria to mammals [5]. Serodiagnostic potentials of ferritin have been reported to exist in *Echinococcus granulosus* [6] and *Taenia saginata* [7]. We investigate here whether recombinant *P. westermani* yolk ferritin may be useful for serodiagnosis of paragonimiasis *westermani*.

## Materials and Methods

**Production of recombinant protein.** The coding region of *P. westermani* yolk ferritin cDNA was cut out by appropriate restriction enzymes and was subcloned into bacterial expression plasmid vector pRSET (Invitrogen). *Escherichia coli* strain BL21(DE3)-pLysS (Novagen) was transformed with the recombined pRSET. Overexpression of the recombinant protein was induced by adding isopropylthio- $\beta$ -galactoside to the culture medium. Since the recombinant protein was located in insoluble inclusion bodies, it was purified by following the method of van Wuytswinkel et al. [8], with a partial modification. In brief, the bacterial cells were pelleted, resuspended in 20 mM Tris/maleate buffer (pH 8.0), and sonicated on ice. The bacterial lysate was centrifuged at 12,000 g for 10 min at 4°C. The pellet was washed in 20 mM Tris/maleate buffer (pH 8.0) containing 1 mg/mL deoxycholate, 1 mM EDTA, and 0.2 mg/mL lysozyme and was centrifuged, as aforementioned. The pellet was resuspended in 20 mM Tris/maleate (pH 8.0) containing 8 M urea and 0.2% (vol/vol) Triton X-100 and was again

Received 9 March 2001; revised 27 December 2001; electronically published 16 April 2002.

The study protocol was approved by the institutional review board of Chung-Ang University College of Medicine, Seoul, South Korea.

Financial support: Ministry of Education, Republic of Korea: grant for basic medical sciences (1996).

Reprints or correspondence: Dr. S.-J. Hong, Dept. of Parasitology, Chung-Ang University College of Medicine, Seoul 156-756, South Korea (hongsj@cau.ac.kr).

The Journal of Infectious Diseases 2002;185:1373–5

© 2002 by the Infectious Diseases Society of America. All rights reserved.  
0022-1899/2002/18509-0025\$02.00

centrifuged. The supernatant was saved and was dialyzed against 20 mM Tris/maleate (pH 8.0) overnight at room temperature. It was loaded onto Ni-NTA resin (Qiagen) pre-equilibrated with 20 mM Tris/maleate (pH 8.0). The resin was washed 3 times with a buffer (50 mM  $\text{NaH}_2\text{PO}_4$ , 300 mM NaCl, and 20 mM imidazole [pH 8.0]). The recombinant protein was eluted with the same buffer, but containing 400 mM imidazole, and was dialyzed against 20 mM Tris/maleate buffer (pH 8.0) overnight at room temperature. The recombinant protein thus produced was 28-kDa fusion protein with 4-kDa tag protein. Protein concentration was determined by use of Protein Assay Kit II (BioRad).

**ELISA.** The wells of a 96-well microplate were sensitized with 1  $\mu\text{g}/100 \mu\text{L}$  of the recombinant *P. westermani* yolk ferritin at 4°C overnight. The wells were incubated with sera from humans infected with paragonimiasis *westermani* ( $n = 34$ ), clonorchiasis *sinensis* ( $n = 32$ ), opisthorchiasis *viverrinii* ( $n = 9$ ), schistosomiasis *japonicum* ( $n = 30$ ), fascioliasis *hepatica* ( $n = 10$ ), cysticercosis *cellulosae* ( $n = 20$ ), and sparganosis ( $n = 25$ ) and with sera from uninfected humans ( $n = 10$ ) at a 1:200 dilution at 37°C for 2 h. They were then incubated with peroxidase-conjugated anti-human IgG (Cappel Laboratories) at a 1:2000 dilution for 1 h. Color was developed by using a substrate, *o*-phenylene diamine, and absorbance was measured at 490 nm ( $A_{490}$ ) with a microplate reader (model 3100; Bio-Rad Laboratories). The data obtained were analyzed for diagnostic sensitivity, specificity, and positive and negative predictive values [9], which were defined and calculated as follows: true negative = no. of control sera (other helminthiasis-infected and healthy control sera) that were negative by the assay; true positive = no. of proven paragonimiasis-infected sera that were positive by the assay; false negative = no. of proven paragonimiasis-infected sera that were negative by the assay; false positive = no. of control sera that were positive by the assay; sensitivity = [no. of true positives/(no. of true positives + no. of false negatives)]  $\times 100$ ; specificity = [no. of true negatives/(no. of false positives + no. of true negatives)]  $\times 100$ ; positive predictive value = [no. of true positives/(no. of true positives + no. of false positives)]  $\times 100$ ; negative predictive value = [no. of true negatives/(no. of true negatives + no. of false negatives)]  $\times 100$ .

**Immunoblot.** The recombinant *P. westermani* yolk ferritin was separated by 12.5% SDS-PAGE and was electrotransferred onto a nitrocellulose membrane. Each stripped membrane was incubated, at a 1:200 dilution, with the pooled cat sera, which were collected at 0, 2, 4, 6, 8, 10, 13, and 15 weeks after the experimental infections with *P. westermani* metacercariae. The sera were incubated with peroxidase-conjugated anti-cat IgG (Cappel Laboratories) at a 1:2000 dilution, and color was developed by using 4-chloro-1-naphthol as a substrate.

## Results

Absorbances of ELISA, obtained by using the recombinant *P. westermani* yolk ferritin as an antigen, are plotted in figure 1. The cutoff absorbance for a positive reaction was set at ( $A_{490}$ ) = 0.214, which was a mean + 10 SD of the absorbances obtained from uninfected control sera. Of 34 paragonimiasis-infected sera, 30 were determined to be positive, representing

a sensitivity of 88.2% (absorbance range, 0.068–0.660; mean  $\pm$  SD,  $0.469 \pm 0.139$ ). Absorbances of sera of the other helminthiasis were below the cutoff absorbance. The mean of the absorbance to paragonimiasis serum was  $> 5$  times higher than those of the other helminthiasis sera. Since there were no cross-reactions to other helminthiasis sera, 100% was the specificity of the ELISA using the recombinant *P. westermani* yolk ferritin. The cutoff value employed, 0.214, which was even lower than the conventional cutoff value of 0.25 [10], produced good positive and negative predictive values of 100% and 97.1%, respectively.

IgG antibodies reacting to the recombinant *P. westermani* yolk ferritin were detected by an immunoblot in experimental cat sera after 13 weeks of the metacercarial infection (figure 2).

## Discussion

As for molecular biological properties, *P. westermani* yolk ferritin shared a low sequence homology with those of vertebrate and invertebrate animals (data not shown). However, a ferroxidase center was predicted to be formed with a coordination of the highly conserved iron-binding amino acid residues [5], conferring an enzymatic function to the molecule. From a sero-diagnostic point of view, the low homology of *P. westermani* yolk ferritin to those of invertebrates, including helminthic parasites, seems to favor its antigenic specificity.

*E. granulosus* ferritin was reported earlier to show a specific antigenicity with cystic and alveolar echinococcosis sera but not with cysticercosis sera [6], whereas *T. saginata* ferritin cross-reacted to both cysticercosis and hydatidosis sera [7]. Although

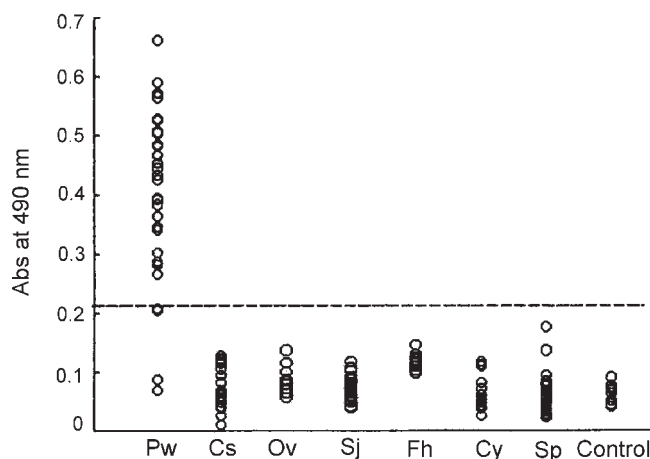

**Figure 1.** ELISA using recombinant *Paragonimus westermani* yolk ferritin in sera from patients with paragonimiasis *westermani* or various helminthiasis. Each circle (○) represents the mean absorbance (Abs) of 3 wells. Pw, paragonimiasis *westermani*; Cs, clonorchiasis *sinensis*; Ov, opisthorchiasis *viverrinii*; Sj, schistosomiasis *japonicum*; Fh, fascioliasis *hepatica*; Cy, cysticercosis *cellulosae*; Sp, sparganosis; control, uninfected human. Cutoff value at absorbance 0.214 is shown (dashed line).

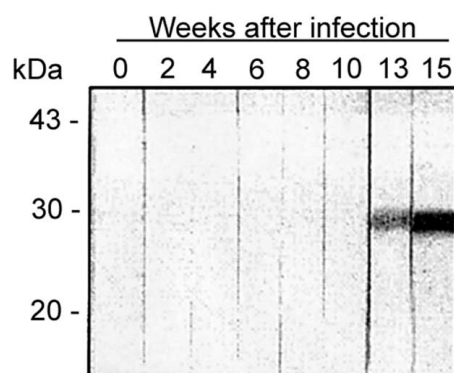

**Figure 2.** Immunoblot of recombinant *Paragonimus westermani* yolk ferritin probed with pooled sera of cats infected with *P. westermani*. Antibody reactivity was detected after 13 weeks of infection.

cestode ferritins share antigenic epitopes among the systematically related taxa, the recombinant *P. westermani* yolk ferritin do not cross-react to them (figure 1).

The ferritin was localized in vitellaria and eggs of adult *P. westermani* (data not shown). Yolk materials produced in vitellaria are provided to ova and packed in the eggs. In cats, *P. westermani* grows up to be an egg-producing adult between 7 and 8 weeks after the infection [1]. An increase in IgG antibody levels in the cat sera to the egg extract of *P. westermani* was attributed to a 28-kDa molecule after 13 weeks of the infection [11]. The antibody response to the recombinant *P. westermani* yolk ferritin, shown in figure 2 in regard to the 28-kDa molecule, is in accord with the egg production of the worm, with a transition of 4–5 weeks.

Eggs of *P. westermani* remain alive in the pulmonary (their natural habitat) and in extrapulmonary tissues for prolonged periods after the fluke dies. A seropositive result obtained by using egg antigens of various types, including yolk ferritin, may

imply that the patient is in a prolonged chronic stage of the infection. We propose here that the recombinant *P. westermani* yolk ferritin is a potent antigen for serodiagnosis of human paragonimiasis *westermani* in early and prolonged stages.

## References

1. Blair D, Xu ZB, Agatsuma T. Paragonimiasis and the genus *Paragonimus*. *Adv Parasitol* **1999**;42:113–222.
2. Hillyer GV, Serrano AE. The antigens of *Paragonimus westermani*, *Schistosoma mansoni*, and *Fasciola hepatica* adult worms: evidence for the presence of cross-reactive antigens and for cross-protection to *Schistosoma mansoni* infection using antigens of *Paragonimus westermani*. *Am J Trop Med Hyg* **1983**;32:350–8.
3. Imai J. Evaluation of ELISA for the diagnosis of paragonimiasis *westermani*. *Trans R Soc Trop Med Hyg* **1987**;81:3–6.
4. Ikeda T, Oikawa Y, Nishiyama T. Enzyme-linked immunosorbent assay using cysteine proteinase antigens for immunodiagnosis of human paragonimiasis. *Am J Trop Med Hyg* **1996**;55:435–7.
5. Thiel EC. Ferritin: structure, gene regulation, and cellular function in animals, plants, and microorganisms. *Ann Rev Biochem* **1987**;56:289–315.
6. Ersfeld K, Craig PS. Cloning and immunological characterization of *Echinococcus granulosus* ferritin. *Parasitol Res* **1995**;81:382–7.
7. Benitez L, Harrison LJS, Parkhouse RME, Garate T. Sequence and immunogenicity of *Taenia saginata* ferritin. *Mol Biochem Parasitol* **1996**;82:113–6.
8. van Wuytswinkel O, Savino G, Briat JF. Purification and characterization of recombinant pea-seed ferritins expressed in *Escherichia coli*: influence of N-terminus deletions on protein solubility and core formation in vitro. *Biochem J* **1995**;305:253–61.
9. Maleewong W, Wongkham C, Intapan PM, Pipitgool V. *Fasciola gigantica*-specific antigens: purification by a continuous-elution method and its evaluation for the diagnosis of human fascioliasis. *Am J Trop Med Hyg* **1999**;61:648–51.
10. Cho SY, Hong ST, Rho YH, Choi S, Han YC. Application of micro-ELISA in serodiagnosis of human paragonimiasis. *Korean J Parasitol* **1981**;19:151–6.
11. Kong Y, Chung JY, Yun DH, et al. Variation of antigenic proteins of eggs and developmental stages of *Paragonimus westermani*. *Korean J Parasitol* **1997**;35:197–202.
